# Supplementary material
Source: HighWire-hosted journal article supplement (https://jnis.bmj.com/highwire/filestream/175998/field_highwire_adjunct_files/0/jnis-2022-019777supp001_data_supplement.pdf)
Supplement: jnis-2022-019777supp001_data_supplement.pdf [file jnis-2022-019777supp001_data_supplement.pdf]

Supplemental Table-1

## Mechanical Thrombectomy Procedure Codes

| Px code | Description                                                                                           |
|---------|-------------------------------------------------------------------------------------------------------|
| 03CG3ZZ | Extirpation of Matter from Intracranial Artery, Percutaneous Approach                                 |
| 03CG3Z7 | Extirpation of Matter from Intracranial Artery using Stent Retriever, Percutaneous Approach           |
| 03CG3Z6 | Extirpation of Matter from Intracranial Artery, Bifurcation, Percutaneous Approach                    |
| 03CH3ZZ | Extirpation of Matter from Right Common Carotid Artery, Percutaneous Approach                         |
| 03CH3Z7 | Extirpation of Matter from Right Common Carotid Artery using Stent Retriever, Percutaneous Approach   |
| 03CJ3ZZ | Extirpation of Matter from Left Common Carotid Artery, Percutaneous Approach                          |
| 03CJ3Z7 | Extirpation of Matter from Left Common Carotid Artery using Stent Retriever, Percutaneous Approach    |
| 03CK3ZZ | Extirpation of Matter from Right Internal Carotid Artery, Percutaneous Approach                       |
| 03CK3Z7 | Extirpation of Matter from Right Internal Carotid Artery using Stent Retriever, Percutaneous Approach |
| 03CL3ZZ | Extirpation of Matter from Left Internal Carotid Artery, Percutaneous Approach                        |
| 03CL3Z7 | Extirpation of Matter from Left Internal Carotid Artery using Stent Retriever, Percutaneous Approach  |
| 03CM3ZZ | Extirpation of Matter from Right External Carotid Artery, Percutaneous Approach                       |
| 03CM3Z7 | Extirpation of Matter from Right External Carotid Artery using Stent Retriever, Percutaneous Approach |
| 03CN3ZZ | Extirpation of Matter from Left External Carotid Artery, Percutaneous Approach                        |
| 03CN3Z7 | Extirpation of Matter from Left External Carotid Artery using Stent Retriever, Percutaneous Approach  |
| 03CP3ZZ | Extirpation of Matter from Right Vertebral Artery, Percutaneous Approach                              |
| 03CP3Z7 | Extirpation of Matter from Right Vertebral Artery using Stent Retriever, Percutaneous Approach        |
| 03CQ3ZZ | Extirpation of Matter from Left Vertebral Artery, Percutaneous Approach                               |
| 03CQ3Z7 | Extirpation of Matter from Left Vertebral Artery using Stent Retriever, Percutaneous Approach         |
| 03CS3ZZ | Extirpation of Matter from Right Temporal Artery, Percutaneous Approach                               |
| 03CT3ZZ | Extirpation of Matter from Left Temporal Artery, Percutaneous Approach                                |
| 03CY3ZZ | Extirpation of Matter from Upper Artery, Percutaneous Approach                                        |
